# Supplementary material for: Model simulations of atmospheric methane and their evaluation using AGAGE/NOAA surface- and IAGOS-CARIBIC aircraft observations, 1997–2014
Source: Copernicus journal article supplement (doi:10.5194/acp-2017-1212), 2018-02-15
Supplement: Supplementary file 1 [file acp-2017-1212-supplement.pdf]

## Supplement

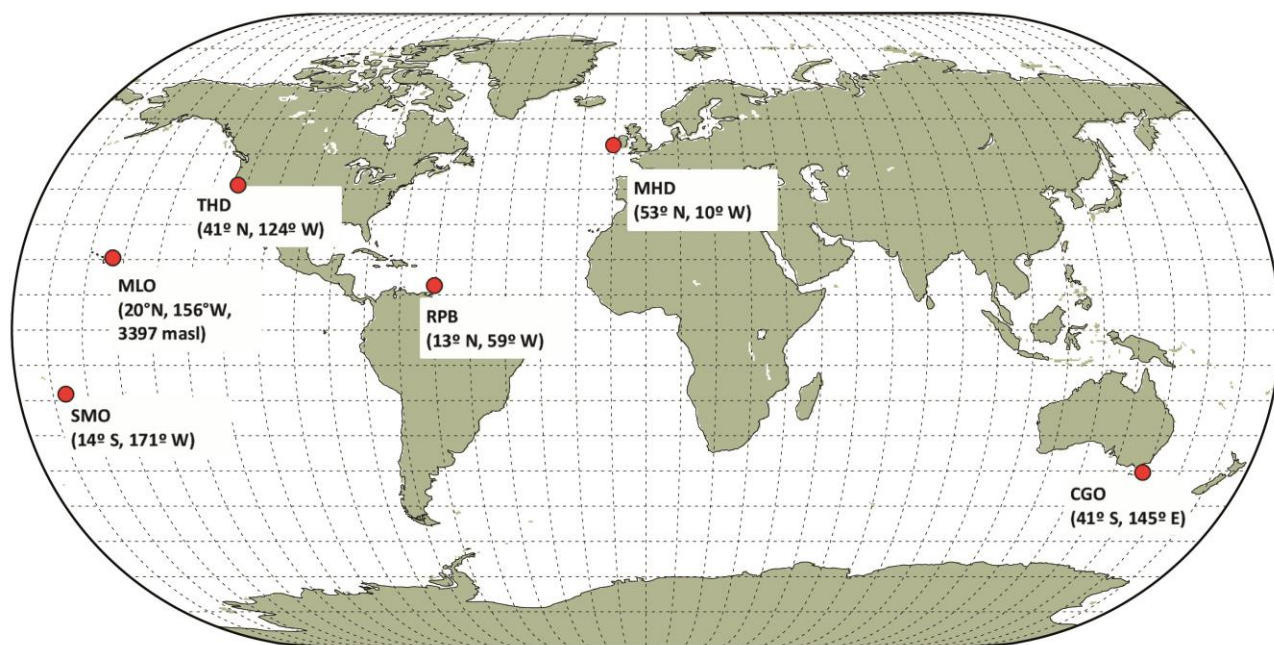

Figure S1: AGAGE/ NOAA stations

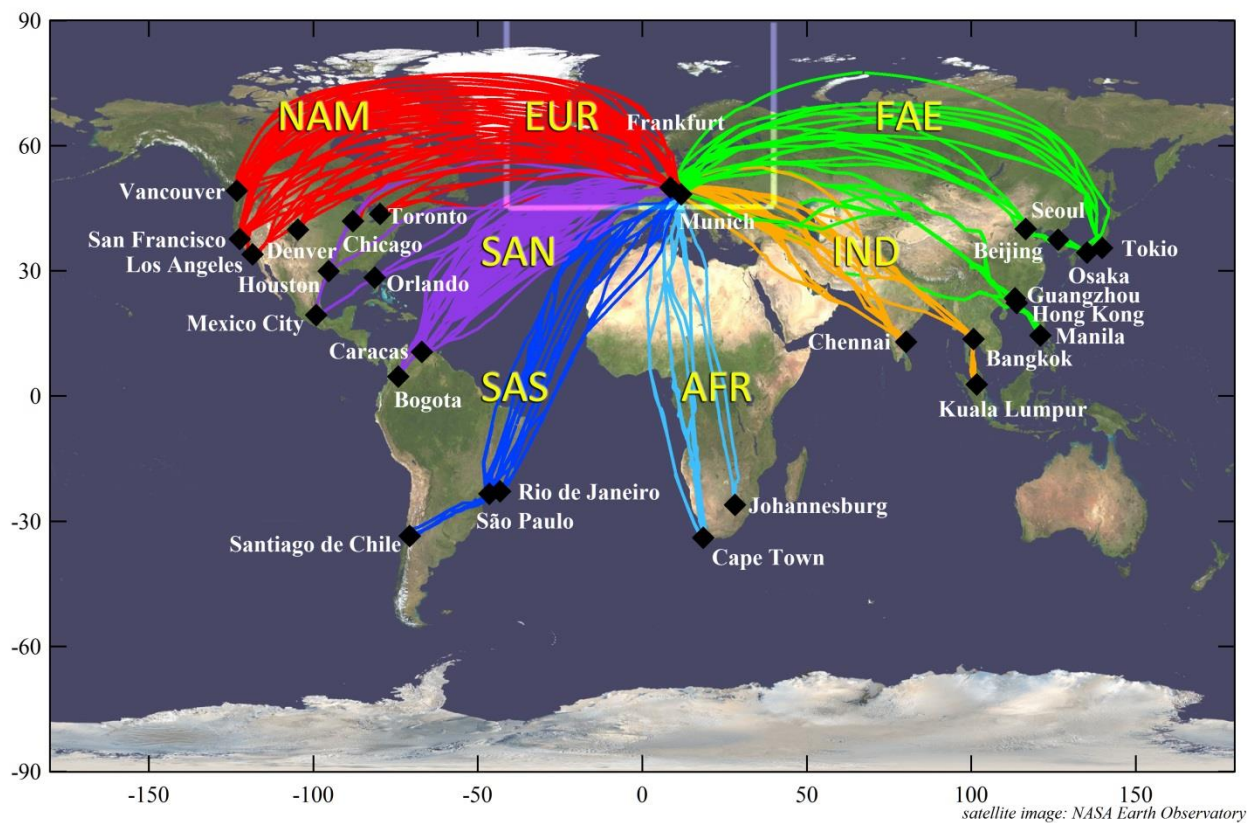

Figure S2: CARIBIC flights and destinations

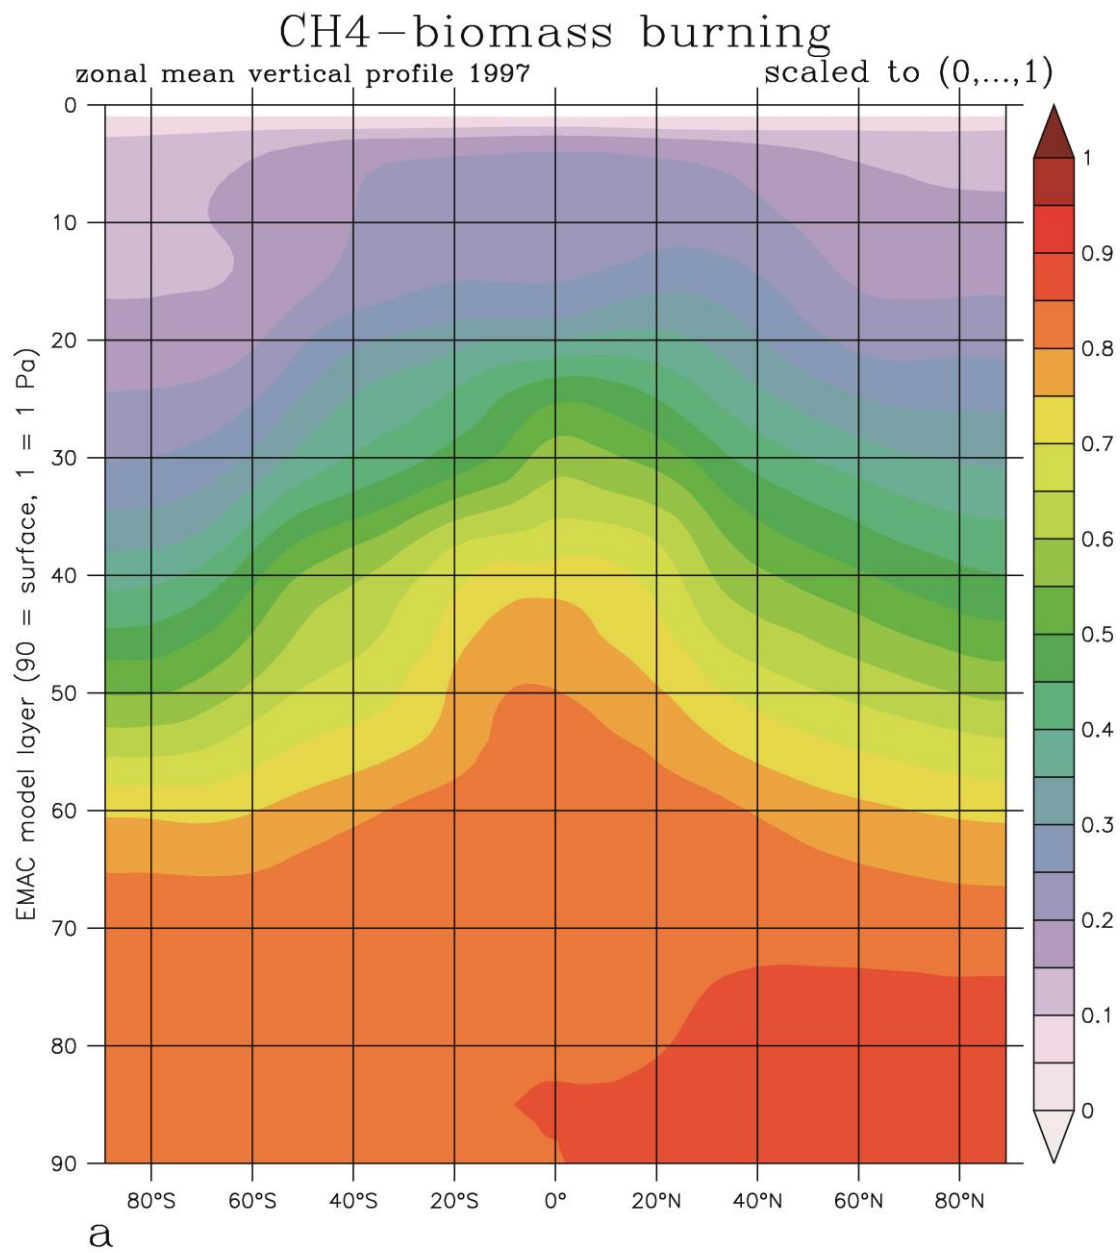

Figure S3:

a: Zonal mean biomass burning CH<sub>4</sub> mixing-ratios in 1997 (scaled to 0 ... 1).

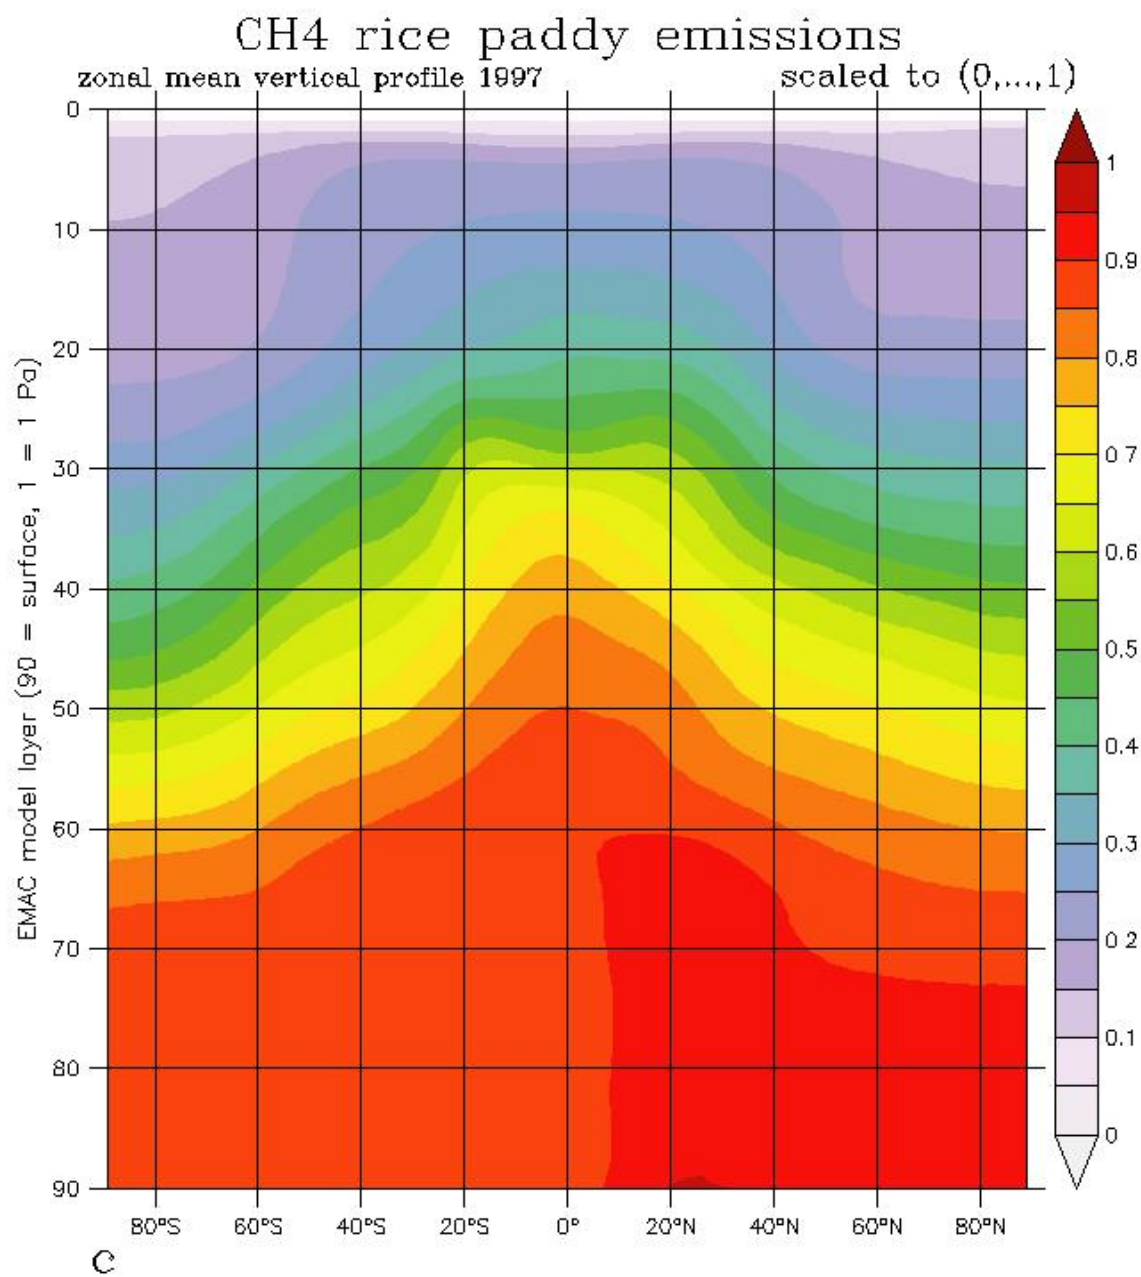

b: same, but for tropical rice paddy released CH<sub>4</sub> mixing-ratios.





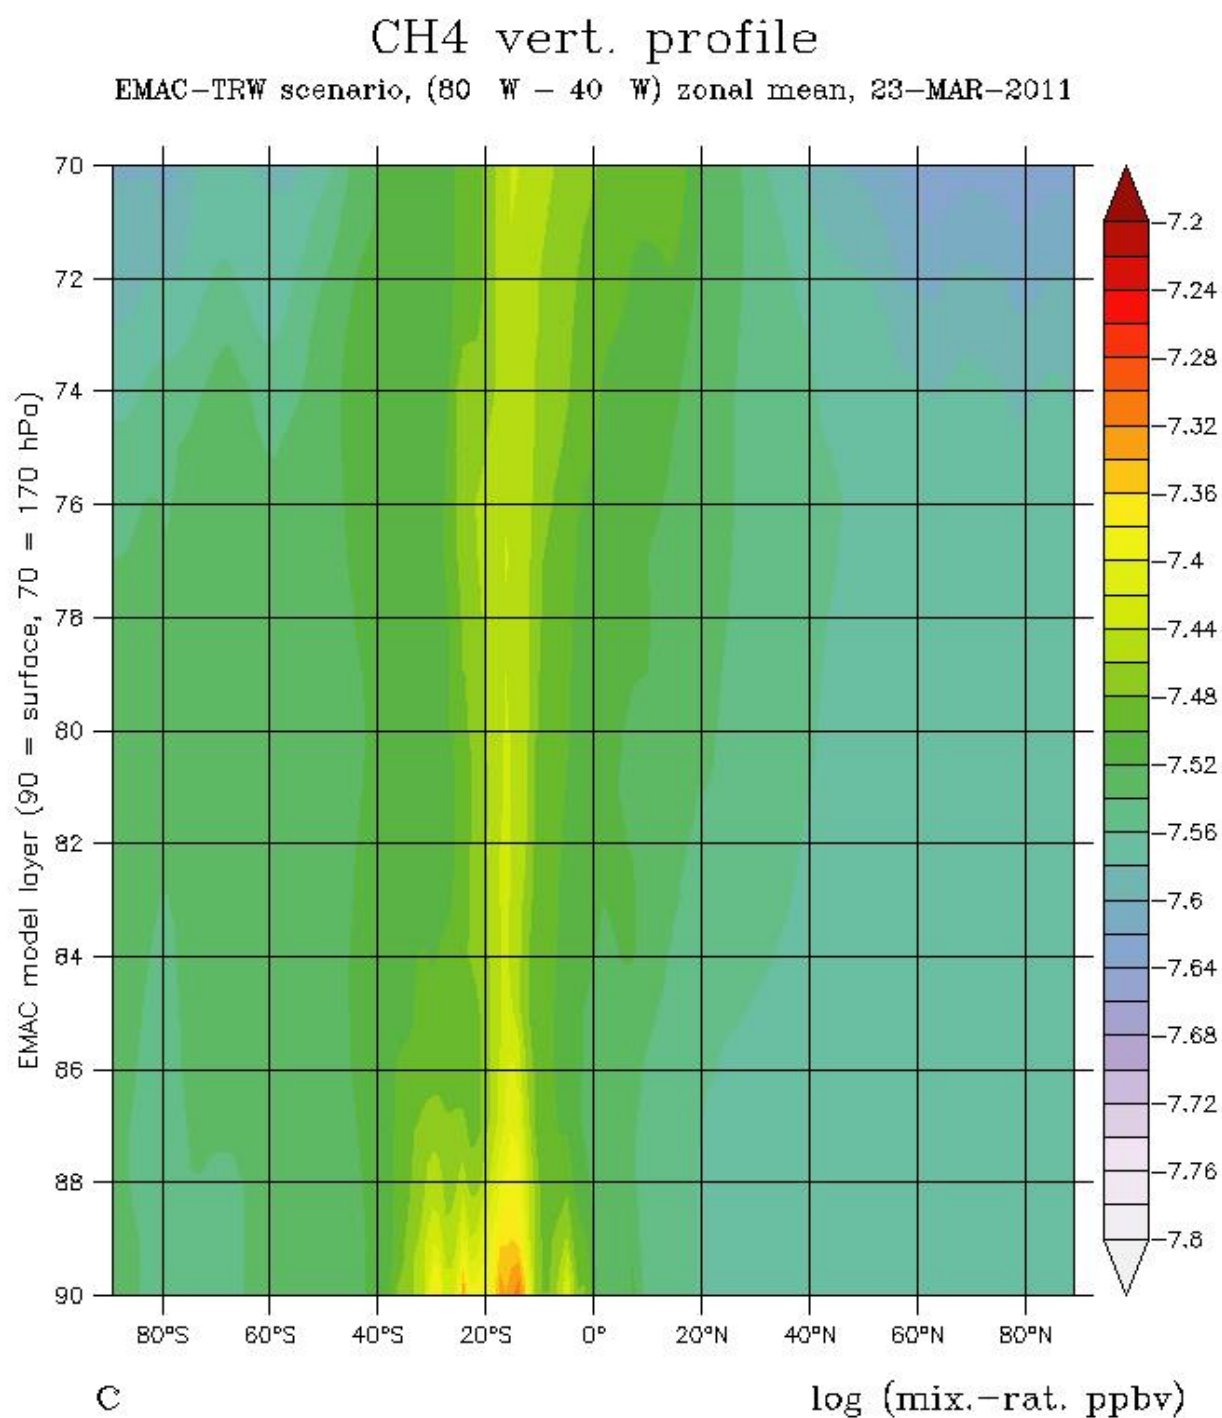

Figure S5:

a: Vertical methane mixing ratio distribution of tagged TRO emissions.

# CH<sub>4</sub> vert. profile

EMAC-SHA scenario, (120 W – 70 W) zonal mean, 23-MAR-2011

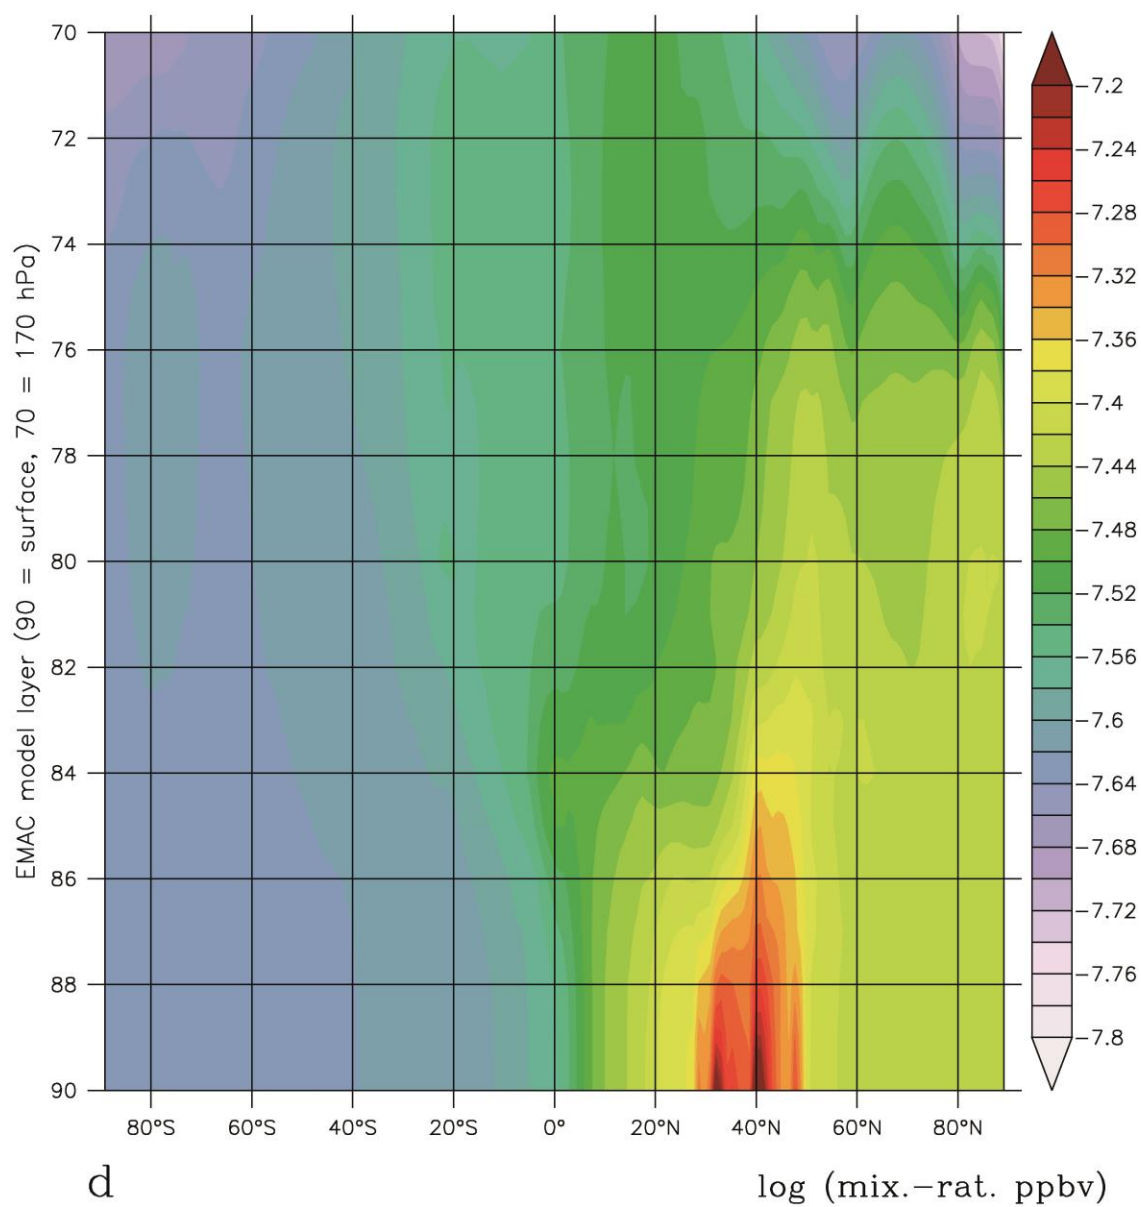

b: Same as c, but for SHA emissions.

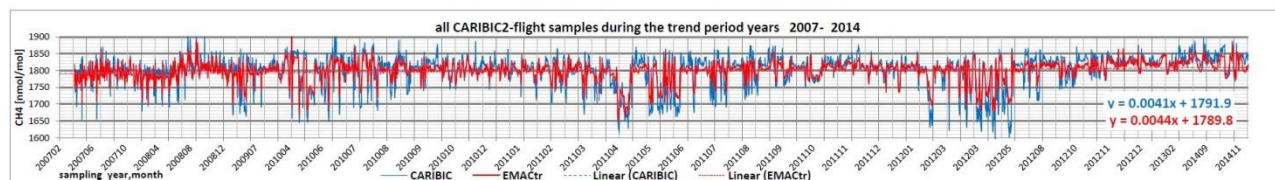

Figure S6

a: EMAC calculated  $\text{CH}_4$ , including trend, and CARIBIC-2 observations 2007 through 2014.

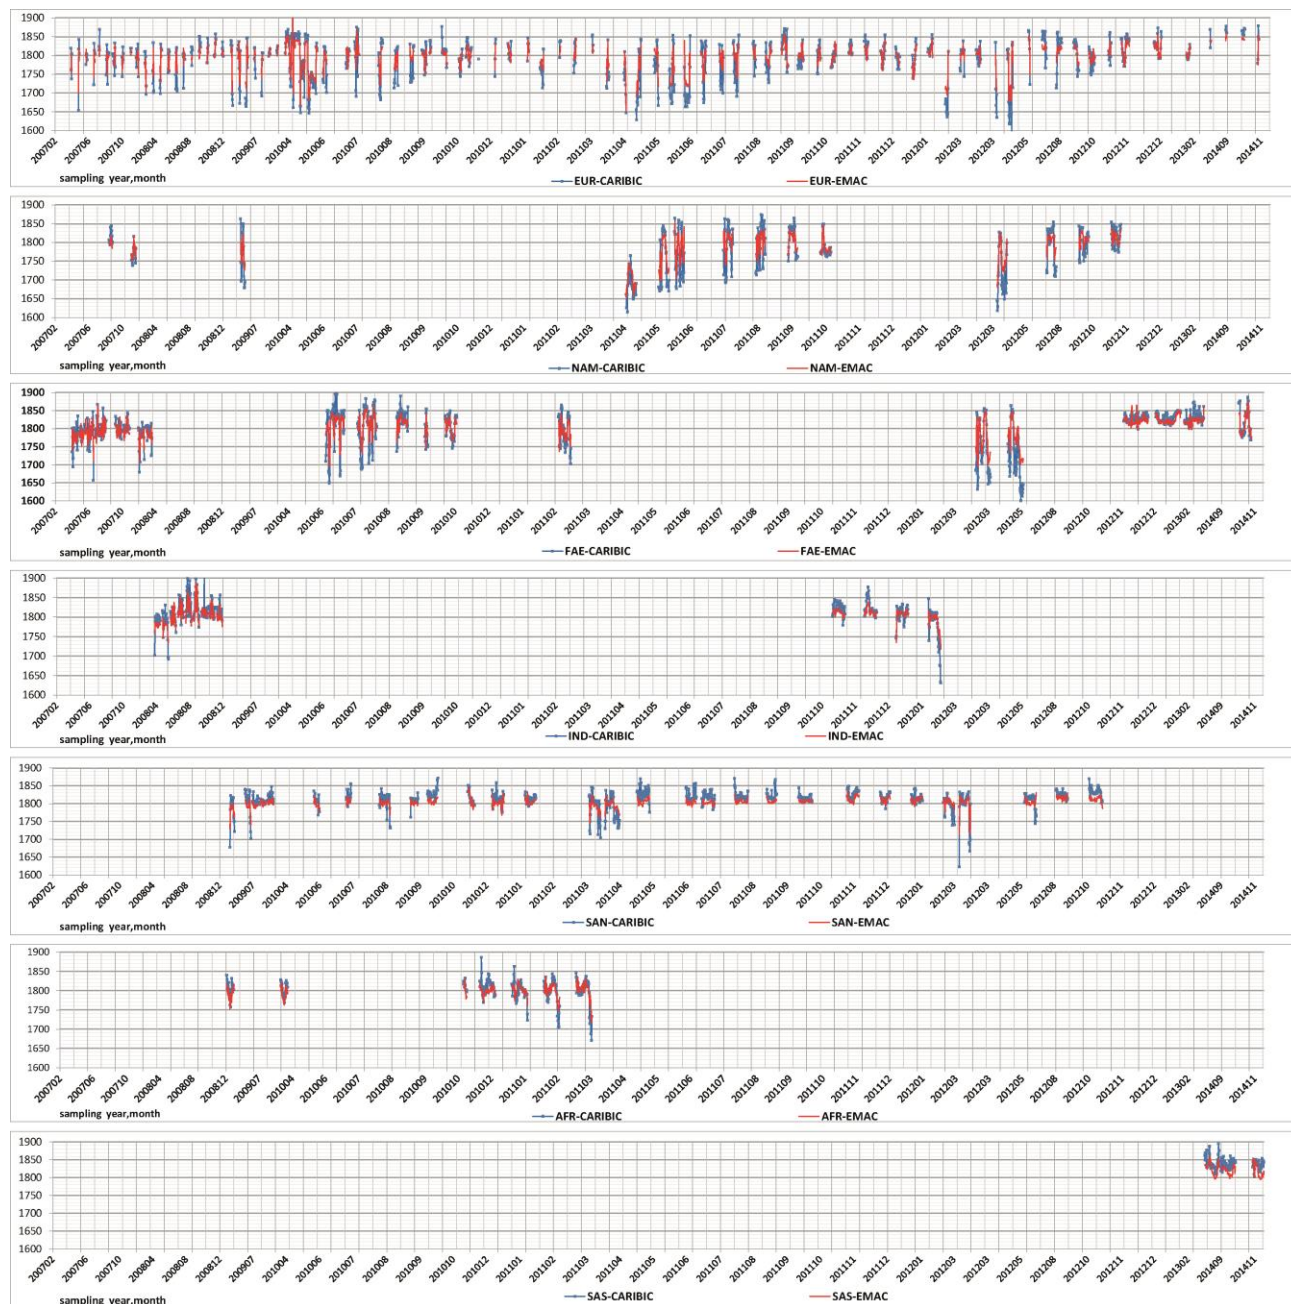

b: same as Fig. 6a but resolved by flight regions.



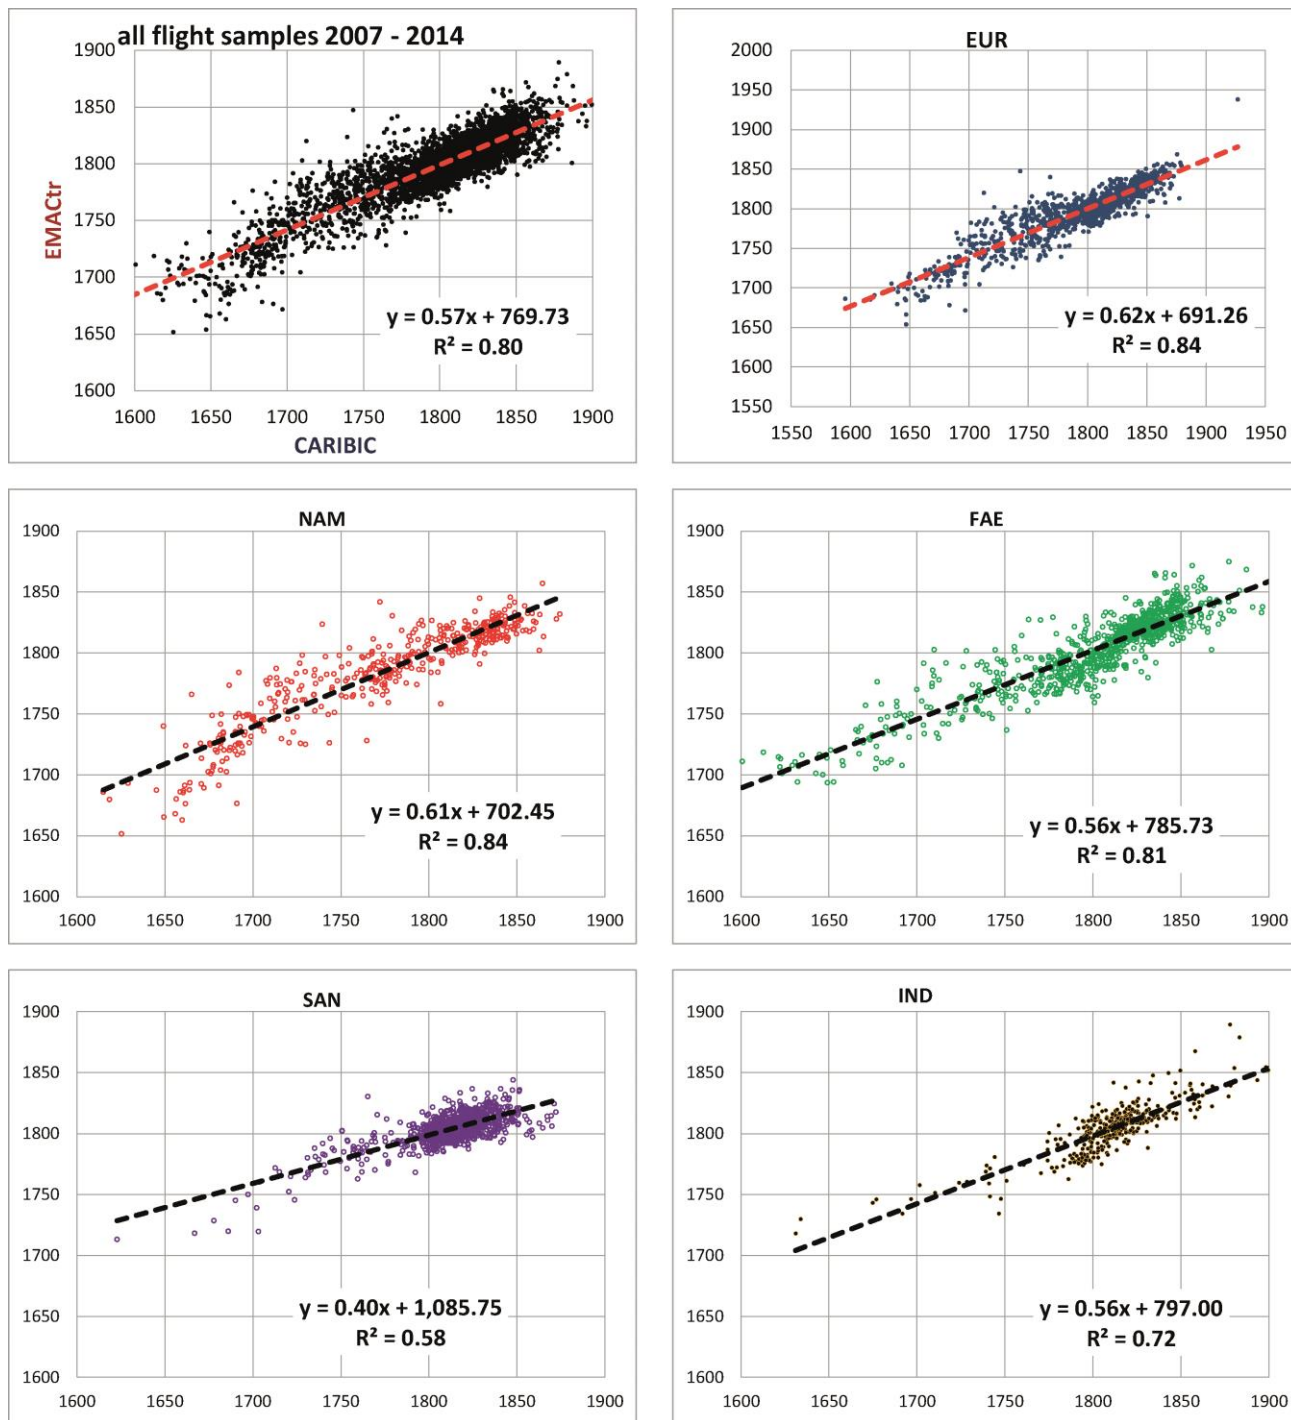

Figure S7: Linear regression between CARIBIC-2 samples and EMAC calculations for all trend period flights (2007 - 2014) and for flight regions with more than 300 samples.

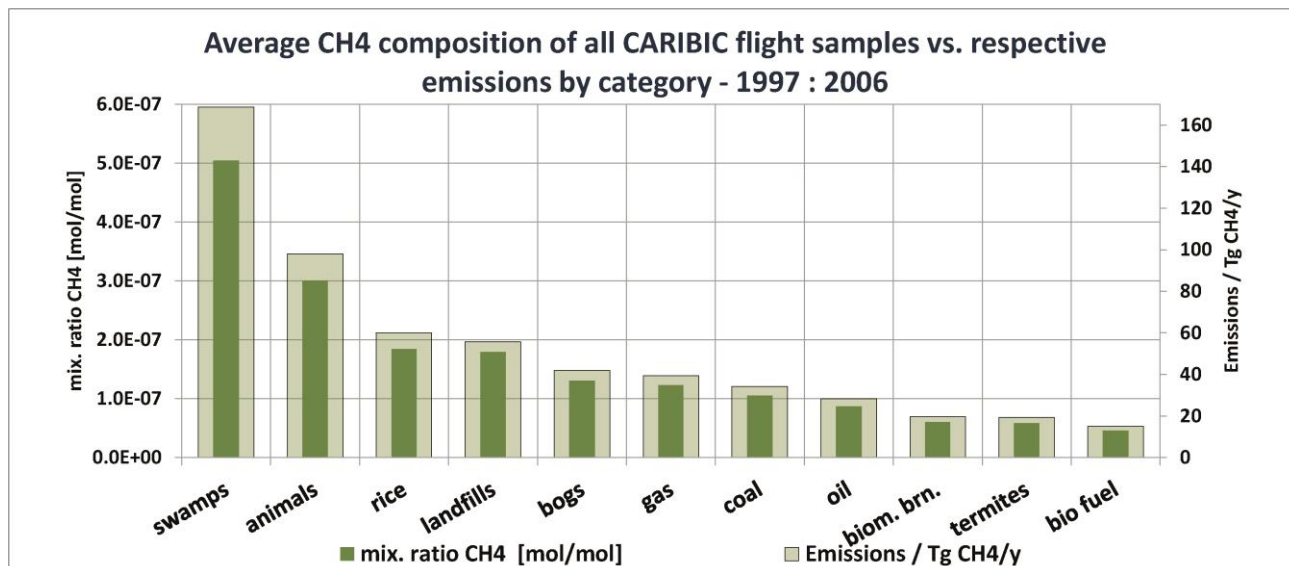

Figure S8. Average CH<sub>4</sub> composition of all CARIBIC flight samples 1997 - 2006, compared to respective emissions.
